# Supplementary material for: Interferon-driven alterations of the host’s amino acid metabolism in the pathogenesis of typhoid fever
Source: PubMed Central journal article supplement — J Exp Med. 2016 May 30;213(6):1061–77. doi: 10.1084/jem.20151025 (PMC4886356; doi:10.1084/jem.20151025), 2016-05-30
Supplement: supp_jem.20151025_JEM_20151025_sm.pdf [file supp_jem.20151025_JEM_20151025_sm.pdf]

SUPPLEMENTAL MATERIAL

Blohmke et al., <http://www.jem.org/cgi/content/full/jem.20151025/DC1>

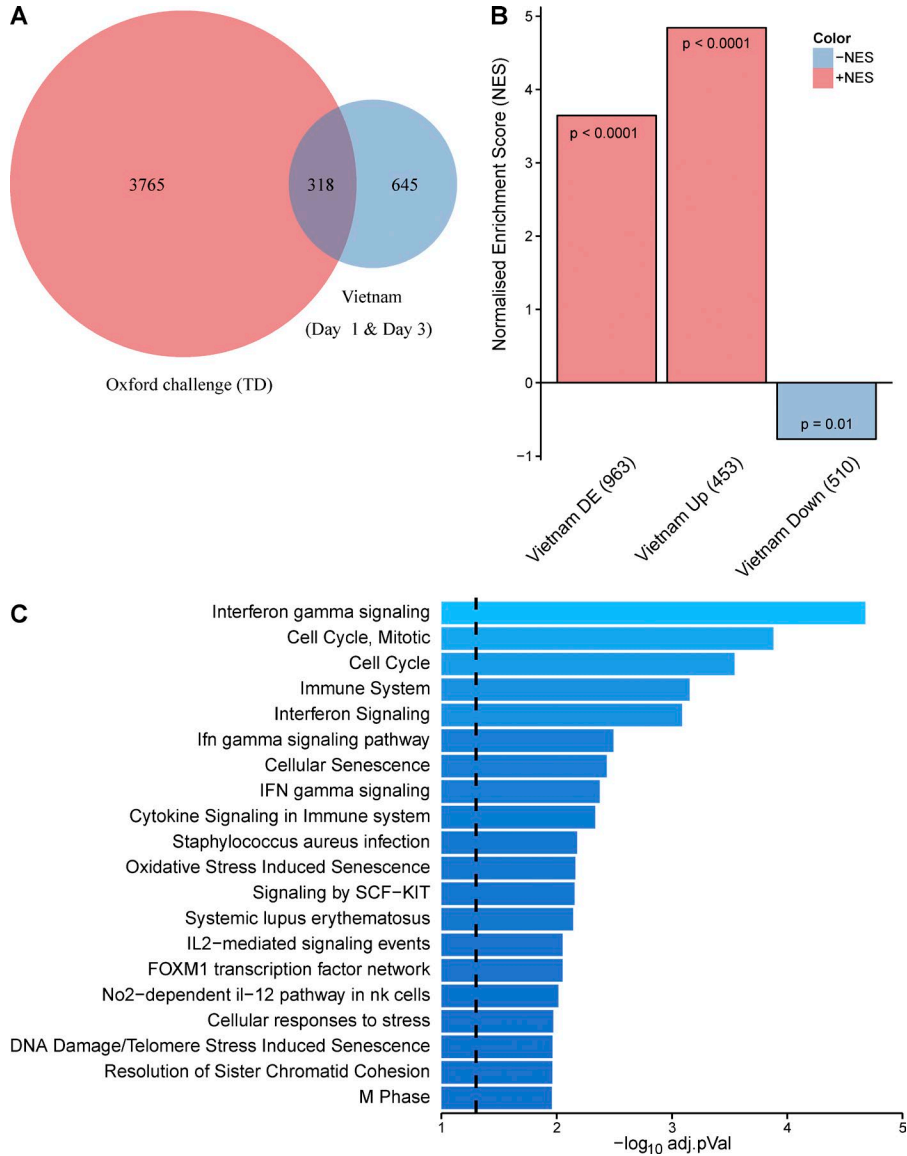

Figure S1. **Transcriptional data in typhoid patients from Vietnam.** (A) Venn diagram illustrating the overlap of differentially expressed genes (FC,  $\pm 1.25$ ; false discovery rate,  $< 0.05$ ) in patients with acute typhoid in Vietnam (day 1 or 3 after hospitalization) and participants at TD in the challenge study. (B) GSEA of custom gene sets from the Vietnam study (1,000 iterations, BH p-value). (C) 20 most significantly overrepresented pathway based on significantly expressed genes (FC,  $\pm 1.5$ ,  $P < 0.01$ ) in samples derived from typhoid confirmed patients in Vietnam at day 1 or 3 after admission to hospital.

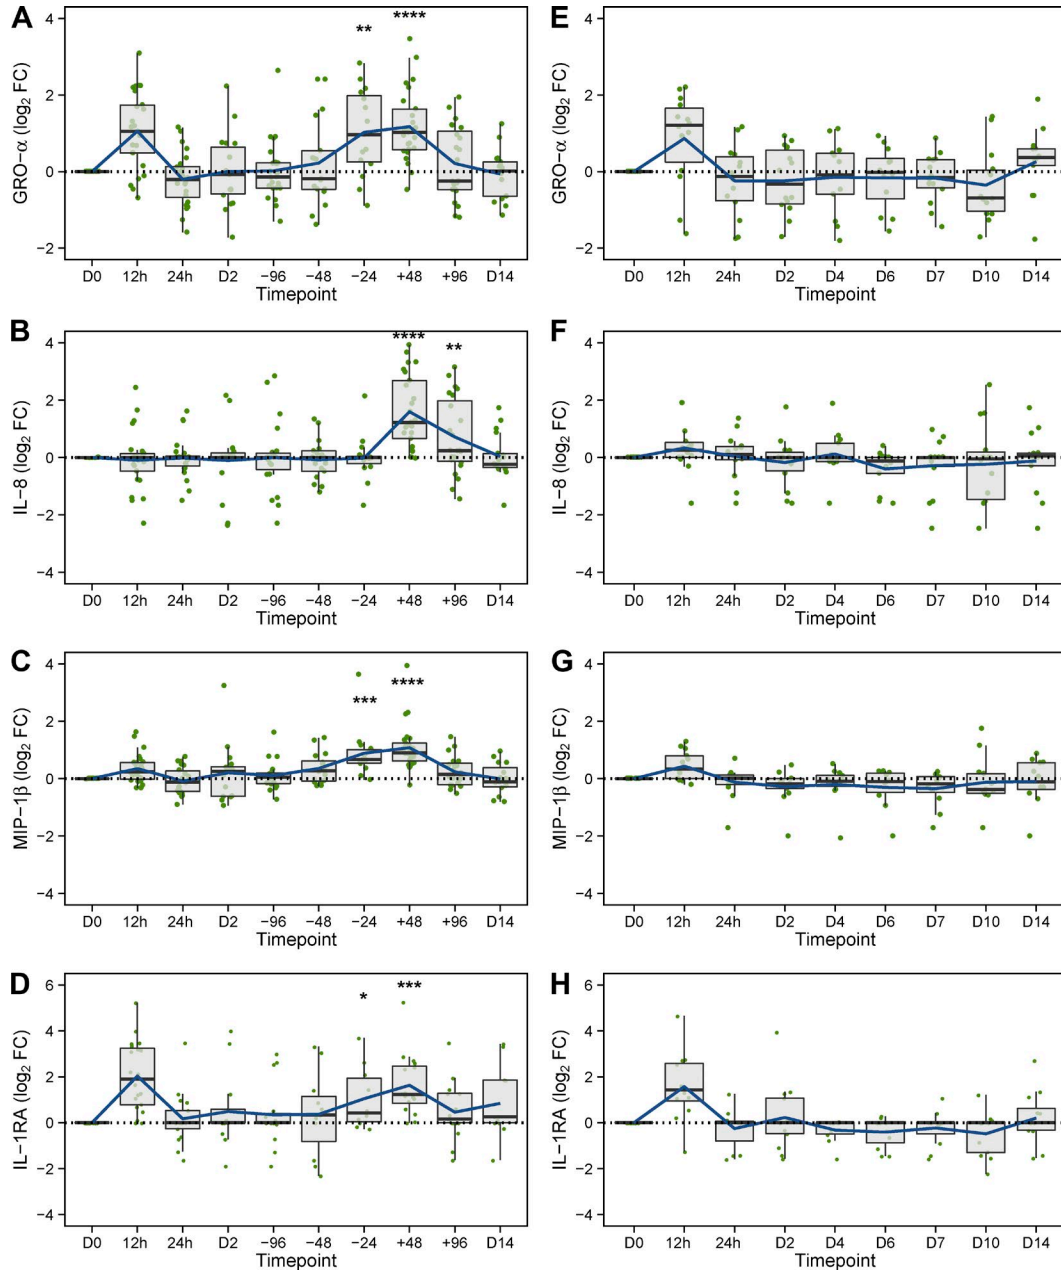

Figure S2. **Longitudinal cytokine levels after challenge.** Cytokine induction [ $\log_2$  FC/D0] in participants diagnosed with acute typhoid ( $n = 25$ ; A-D) and those who stayed well ( $n = 16$ ; E-H). Data are median with 25th/75th percentile, and blue line depicts the mean. Each sample was run in duplicates. \*,  $P < 0.05$ ; \*\*,  $P < 0.01$ ; \*\*\*,  $P < 0.001$ ; \*\*\*\*,  $P < 0.0001$  using one-sample Student's  $t$  test.

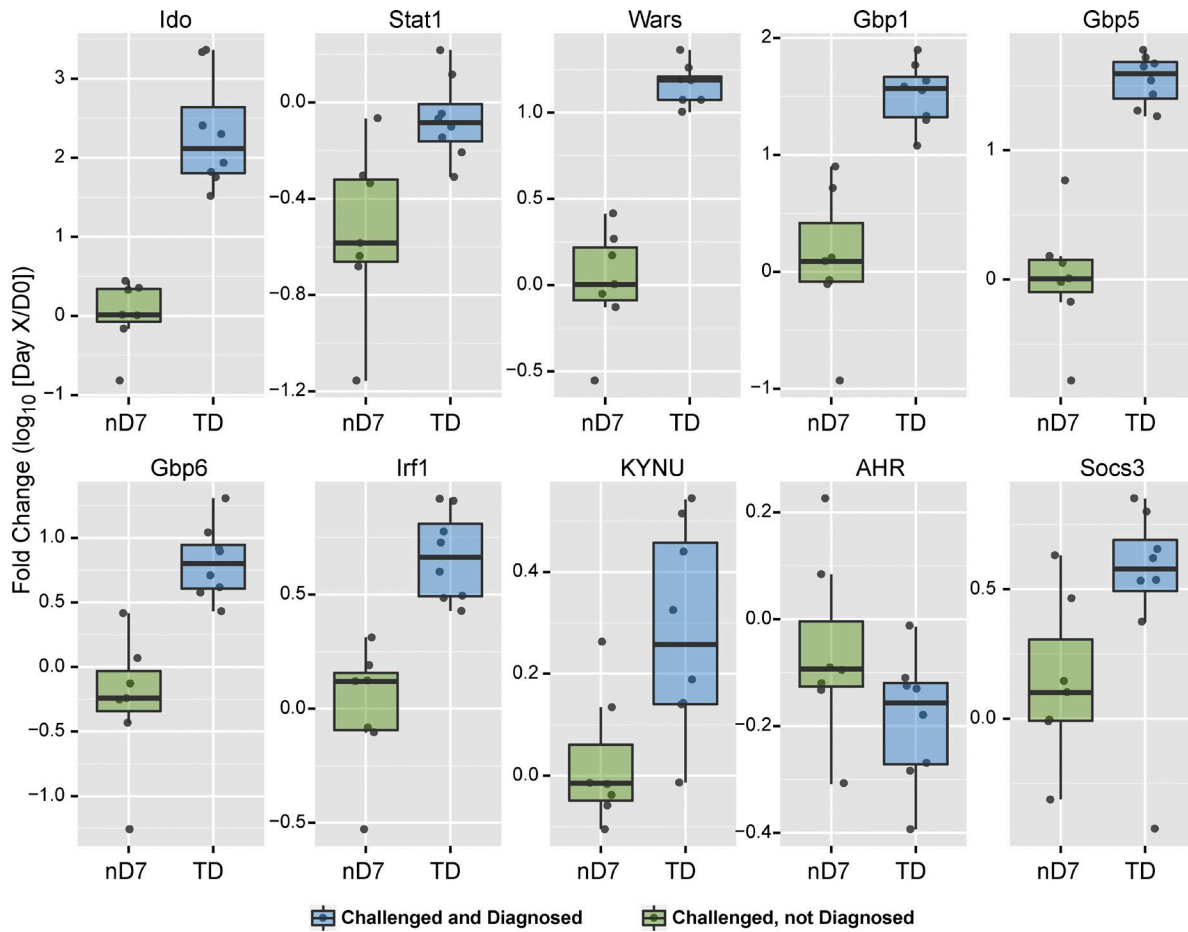

Figure S3. Q-PCR validation of key genes. Gene expression (log<sub>2</sub> FC) compared with baseline samples was determined for those who were diagnosed (TD;  $n = 8$ ; blue) and those who stayed well (nD7;  $n = 7$ ; green).

**Table S1. Differentially expressed genes after challenge**

| Time Point | FC > 1.5; BH < 0.05 |
|------------|---------------------|
| nD7        | 335                 |
| TD-24      | 2,970               |
| TD         | 2,301               |
| TD+24      | 3,450               |

**Table S2. Analytes measured by multiplex cytokine assay**

| Time <sup>a</sup> | Time <sup>b</sup> | Time <sup>c</sup> | Analytes                                                                                                                                                                              |
|-------------------|-------------------|-------------------|---------------------------------------------------------------------------------------------------------------------------------------------------------------------------------------|
| D0 0 h            | D0 0 h            | D0 0 h            |                                                                                                                                                                                       |
| D0 12 h           | D0 12 h           | D0 12 h           |                                                                                                                                                                                       |
| D1 24 h           | D1 24 h           | D1 24 h           |                                                                                                                                                                                       |
| D2                | D2                | -                 |                                                                                                                                                                                       |
| TD-96 h           | -                 | -                 | EGF, Flt-3L, Fractalkine (CX3CL1), GRO $\alpha$ , IFN $\gamma$ , IL-1 $\alpha$ , IL-1RA, IL-2, IL-6, IL-8, IL-10, IL-12p40, IL-17, IP-10, MIP-1 $\beta$ , sCD40L, TNF $\alpha$ , VEGF |
| TD-48 h           | D4                | -                 |                                                                                                                                                                                       |
| TD-24 h           | D6                | -                 |                                                                                                                                                                                       |
| TD+48 h           | D7                | -                 |                                                                                                                                                                                       |
| TD+96 h           | D10               | -                 |                                                                                                                                                                                       |
| D14               | D14               | -                 |                                                                                                                                                                                       |

<sup>a</sup>Participants who were diagnosed with acute typhoid fever.

<sup>b</sup>Participants who stayed well throughout the challenge period.

<sup>c</sup>Participants who ingested 120 ml NaHCO<sub>3</sub> solution only.

**Table S3. Summary statistics of cytokine measurements of all 18 analytes**

| Analyte     | Participants diagnosed with typhoid fever |                         |                         | Participants not reaching diagnosis criteria |                          |                         | Category         |
|-------------|-------------------------------------------|-------------------------|-------------------------|----------------------------------------------|--------------------------|-------------------------|------------------|
|             | Median V1 0 h <sup>1</sup>                | Median V1 12 h [range]  | Median TD+48 h [range]  | Median V1 0 h                                | Median V1 12 h [range]   | Median V1 12 h [range]  |                  |
| sCD40L      | 252.83                                    | 3447.76 [109.91–10000]  | 271.05 [103.21–10000]   | 262.36                                       | 4013.005 [48.32–10000]   | 269.205 [2.55–1113.93]  | Proinflammatory  |
| Fractalkine | 32.91                                     | 92.715 [11.35–287.47]   | 50.18 [11.35–161.66]    | 27.285                                       | 68.82 [11.35–307.56]     | 11.35 [11.35–160]       | Chemoattractant  |
| VEGF        | 31.97                                     | 102.9 [13.15–3189.95]   | 89.99 [13.15–3312.65]   | 13.15                                        | 102.9 [13.15–229.83]     | 13.15 [13.15–167.35]    | Growth Factor    |
| EGF         | 4.575                                     | 22.62 [1.6–78.5]        | –                       | 6.23                                         | 24.295 [1.6–79.19]       | 1.6 [1.6–45.04]         | Growth Factor    |
| IL-1RA      | 11.405                                    | 42.83 [4.15–187.47]     | 31.86 [4.15–158.64]     | 11.17                                        | 28.09 [4.15–232.35]      | 9.355 [4.15–151.69]     | Antiinflammatory |
| GRO         | 272.88                                    | 615.96 [197.61–1251.84] | 575.24 [276.1–1406.48]  | 278.82                                       | 585.745 [110.57–1498.13] | 263.77 [130.23–539.59]  | Chemoattractant  |
| IL-8        | 4.53                                      | 5.01 [1.6–85.87]        | 14.47 [1.6–106.54]      | 4.865                                        | 6 [1.6–74.6]             | 2.67 [1.6–84.62]        | Chemoattractant  |
| MIP-1β      | 24.775                                    | 36.28 [1.6–89.5]        | 49.61 [24.46–134.17]    | 23.98                                        | 32.105 [11.44–89.15]     | 23.94 [1.6–84.88]       | Chemoattractant  |
| TNFα        | 8.75                                      | 9.7 [1.6–27.29]         | 31.23 [9.53–55.67]      | 7.76                                         | 9.135 [4.45–22.64]       | 8.535 [3.94–16.6]       | Proinflammatory  |
| IFNγ        | 1.6                                       | 4.25 [1.6–29.87]        | 148.62 [7.17–472.68]    | 1.6                                          | 2.825 [1.6–25.67]        | 1.6 [1.6–5.42]          | Proinflammatory  |
| IP-10       | 326.22                                    | 319.69 [106.62–1221.91] | 4388.32 [513.98–9157.9] | 559.22                                       | 349.865 [227.88–1201.6]  | 398.37 [263.65–1513.52] | Chemoattractant  |
| IL-6        | 1.6                                       | 1.6 [1.6–13.04]         | 4.86 [1.6–22.1]         | 1.6                                          | 2.19 [1.6–34.6]          | 1.6 [1.6–30.34]         | Proinflammatory  |
| IL-12 p40   | 3.85                                      | 3.85 [3.85–120.97]      | 3.85 [3.85–126.1]       | 8.665                                        | 32.845 [3.85–577.59]     | 3.85 [3.85–550.04]      | Proinflammatory  |
| IL-1α       | 4.7                                       | 4.7 [4.7–110.5]         | 4.7 [4.7–116.75]        | 4.7                                          | 4.7 [4.7–278.73]         | 4.7 [4.7–253]           | Proinflammatory  |
| IL-2        | 1.6                                       | 1.6 [1.6–7.73]          | 1.6 [1.6–7.48]          | 1.6                                          | 1.6 [1.6–37.93]          | 1.6 [1.6–38.56]         | Proinflammatory  |
| IL-10       | 1.6                                       | 1.6 [1.6–18.45]         | 3.69 [1.6–21.17]        | 1.6                                          | 3.74 [1.6–59.34]         | 1.6 [1.6–57.88]         | Proinflammatory  |
| IL-17       | 1.6                                       | 4.13 [1.6–150.39]       | 1.6 [1.6–153.21]        | 1.6                                          | 2.67 [1.6–51.55]         | 1.6 [1.6–62.99]         | Proinflammatory  |
| Flt-3L      | 8.155                                     | 20.15 [2.7–62.39]       | 10.705 [2.7–54.9]       | 6.76                                         | 6.45 [2.7–99.44]         | 6.64 [2.7–129.9]        | Proinflammatory  |

All concentrations are in pictograms/milliliters.

**Table S4. Significant cytokine induction at 12 h after challenge**

| Analyte      | P-value |
|--------------|---------|
| IL12         | 0.1994  |
| EGF          | 0.0001  |
| Flt3L        | 0.3252  |
| Fractalkine  | <0.0001 |
| GRO          | <0.0001 |
| IFN $\gamma$ | 0.0580  |
| IL1 $\alpha$ | 0.5200  |
| IL1RA        | <0.0001 |
| IL2          | 0.4265  |
| IL6          | 0.2053  |
| IL8          | 0.9103  |
| IL10         | 0.4469  |
| IL17         | 0.3936  |
| IP10         | 0.1396  |
| MIP1 $\beta$ | 0.0888  |
| sCD40L       | <0.0001 |
| TNF          | 0.0740  |
| VEGF         | 0.0075  |

**Table S5. Linear regression model for dose-dependency of 12 h cytokine increase from baseline<sup>a</sup>**

| Analyte      | Coefficient | P-value | 95% CI     | <i>n</i> |
|--------------|-------------|---------|------------|----------|
| EGF          | 0.60        | <0.0001 | 0.34–0.85  | 35       |
| Flt3L        | 0.34        | 0.0257  | 0.06–0.63  | 33       |
| Fractalkine  | 0.21        | 0.0679  | –0.01–0.44 | 34       |
| GRO          | 0.16        | 0.0499  | 0.01–0.32  | 39       |
| IFN $\gamma$ | 0.32        | 0.0002  | 0.17–0.47  | 38       |
| IL1RA        | 0.52        | <0.0001 | 0.32–0.72  | 32       |
| IL2          | 0.11        | 0.0773  | –0.01–0.23 | 39       |
| IL6          | 0.19        | 0.0084  | 0.06–0.33  | 38       |
| IL10         | –0.03       | 0.6670  | –0.16–0.1  | 39       |
| IL12         | 0.33        | 0.0069  | 0.1–0.55   | 37       |
| IL17         | 0.19        | 0.0317  | 0.02–0.35  | 38       |
| IP10         | 0.01        | 0.7324  | –0.07–0.1  | 39       |
| MIP1 $\beta$ | 0.19        | <0.0001 | 0.11–0.27  | 37       |
| sCD40L       | 0.67        | 0.0008  | 0.31–1.02  | 38       |
| TNF $\alpha$ | 0.16        | 0.0002  | 0.09–0.24  | 38       |
| VEGF         | 0.30        | 0.0210  | 0.06–0.54  | 35       |
| IL8          | –0.06       | 0.4993  | –0.24–0.12 | 39       |
| IL1 $\alpha$ | 0.15        | 0.0371  | 0.01–0.29  | 38       |

<sup>a</sup>Baseline cytokine concentrations were included as covariates.

**Table S6. Logistic regression model with typhoid diagnosis as dependent variable (binary)<sup>a</sup>**

| Analyte      | OR    | P-value | 95% CI        | n  |
|--------------|-------|---------|---------------|----|
| EGF          | 0.81  | 0.83    | 0.11–5.73     | 35 |
| Flt3L        | 1.07  | 0.94    | 0.18–6.47     | 33 |
| Fractalkine  | 6.73  | 0.13    | 0.55–81.83    | 34 |
| GRO          | 1.56  | 0.74    | 0.11–22.4     | 39 |
| IFN $\gamma$ | 17.55 | 0.16    | 0.34–910.51   | 38 |
| IL1RA        | 1.31  | 0.84    | 0.09–19.53    | 32 |
| IL2          | 0.32  | 0.54    | 0.01–12.27    | 39 |
| IL6          | 0.30  | 0.47    | 0.01–7.94     | 38 |
| IL10         | 0.19  | 0.33    | 0.01–5.37     | 39 |
| IL12         | 0.67  | 0.71    | 0.08–5.69     | 37 |
| IL17         | 0.39  | 0.50    | 0.03–6.05     | 38 |
| IP10         | 99.56 | 0.17    | 0.14–68524.92 | 39 |
| MIP1 $\beta$ | 0.10  | 0.46    | 0–44.57       | 37 |
| sCD40L       | 0.66  | 0.54    | 0.18–2.45     | 38 |
| TNF $\alpha$ | 20.54 | 0.35    | 0.04–11815.39 | 38 |
| VEGF         | 1.25  | 0.83    | 0.17–8.98     | 35 |
| IL8          | 0.14  | 0.15    | 0.01–2.03     | 39 |
| IL1 $\alpha$ | 0.04  | 0.07    | 0–1.37        | 38 |

<sup>a</sup>Baseline cytokine concentrations and challenge dose were included as covariates.

**Table S7. Cox proportionate hazard model with time to diagnosis as dependent variable<sup>a</sup>**

| Analyte      | Hazard ratio | P-value | 95% CI      | n  |
|--------------|--------------|---------|-------------|----|
| EGF          | 0.99         | 0.99    | 0.33–2.97   | 35 |
| Flt3L        | 1.14         | 0.81    | 0.38–3.41   | 33 |
| Fractalkine  | 3.21         | 0.12    | 0.73–14.01  | 34 |
| GRO          | 1.36         | 0.73    | 0.23–7.93   | 39 |
| IFN $\gamma$ | 6.35         | 0.05    | 0.99–40.55  | 38 |
| IL1RA        | 1.24         | 0.79    | 0.24–6.35   | 32 |
| IL2          | 0.68         | 0.74    | 0.06–6.76   | 39 |
| IL6          | 0.66         | 0.70    | 0.08–5.33   | 38 |
| IL10         | 0.45         | 0.45    | 0.05–3.64   | 39 |
| IL12         | 1.15         | 0.83    | 0.33–3.88   | 37 |
| IL17         | 0.49         | 0.43    | 0.08–2.89   | 38 |
| IP10         | 4.83         | 0.40    | 0.12–181.63 | 39 |
| MIP1 $\beta$ | 0.29         | 0.51    | 0.007–11.74 | 37 |
| sCD40L       | 0.91         | 0.80    | 0.42–1.92   | 38 |
| TNF          | 10.77        | 0.19    | 0.3–385.41  | 38 |
| VEGF         | 1.18         | 0.79    | 0.35–3.87   | 35 |
| IL8          | 0.47         | 0.29    | 0.11–1.93   | 39 |
| IL1 $\alpha$ | 0.07         | 0.11    | 0.003–1.78  | 38 |

<sup>a</sup>Baseline cytokine concentrations and challenge dose were included as covariates.

**Table S8. Probes used for qPCR validation**

| <b>TaqMan Probe</b> | <b>Gene</b>  | <b>Species</b> |
|---------------------|--------------|----------------|
| Hs00984148_m1       | <i>IDO1</i>  | Human          |
| Hs00188259_m1       | <i>WARS</i>  | Human          |
| Hs00977005_m1       | <i>GBP1</i>  | Human          |
| Hs00369472_m1       | <i>GBP5</i>  | Human          |
| Hs01584201_m1       | <i>GBP6</i>  | Human          |
| Hs00971960_m1       | <i>IRF1</i>  | Human          |
| Hs00169233_m1       | <i>AHR</i>   | Human          |
| Hs01013996_m1       | <i>STAT1</i> | Human          |
| Hs02330328_s1       | <i>SOCS3</i> | Human          |
| Hs01114099_m1       | <i>KYNU</i>  | Human          |
| Hs02758991_g1       | <i>GAPDH</i> | Human          |
| Mm00492590_m1       | <i>IDO1</i>  | Mouse          |
| Mm00457097_m1       | <i>WARS</i>  | Mouse          |
| Mm01288580_m1       | <i>IRF1</i>  | Mouse          |
| Mm00439531_m1       | <i>STAT1</i> | Mouse          |
| Mm00551012_m1       | <i>KYNU</i>  | Mouse          |
| Mm99999915_g1       | <i>GAPDH</i> | Mouse          |
